# Supplementary material for: Words describing feelings about death: A comparison of sentiment for self and others and changes over time
Source: PubMed Central journal article supplement (PMC7787376; doi:10.1371/journal.pone.0242848), 2021-01-06
Supplement: pone.0242848.s007.pdf [file pone.0242848.s007.pdf]

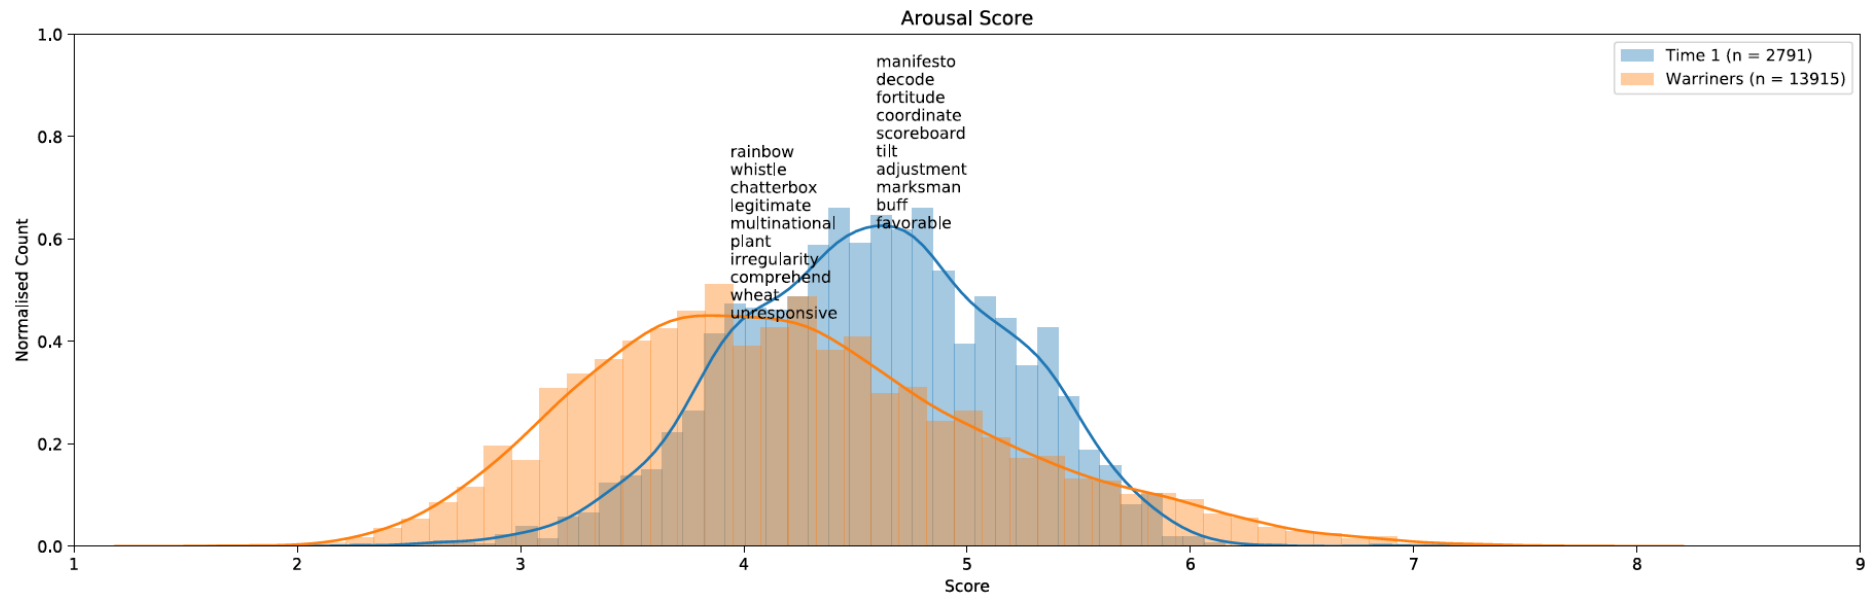

**S2 Fig. Distribution (normalised by number of words) of Arousal score for all words from baseline self personally and the general public (Time 1, blue) and the total Warriner's wordlist (orange). Words listed are 10 representative words selected from the maximum normalised count for each group.**
